# Supplementary material for: It All Starts with a Sandwich: Identification of Sialidases with Trans-Glycosylation Activity
Source: PubMed Central journal article supplement (PMC4930215; doi:10.1371/journal.pone.0158434), 2016-07-01
Supplement: pone.0158434.s003.pdf [file pone.0158434.s003.pdf]

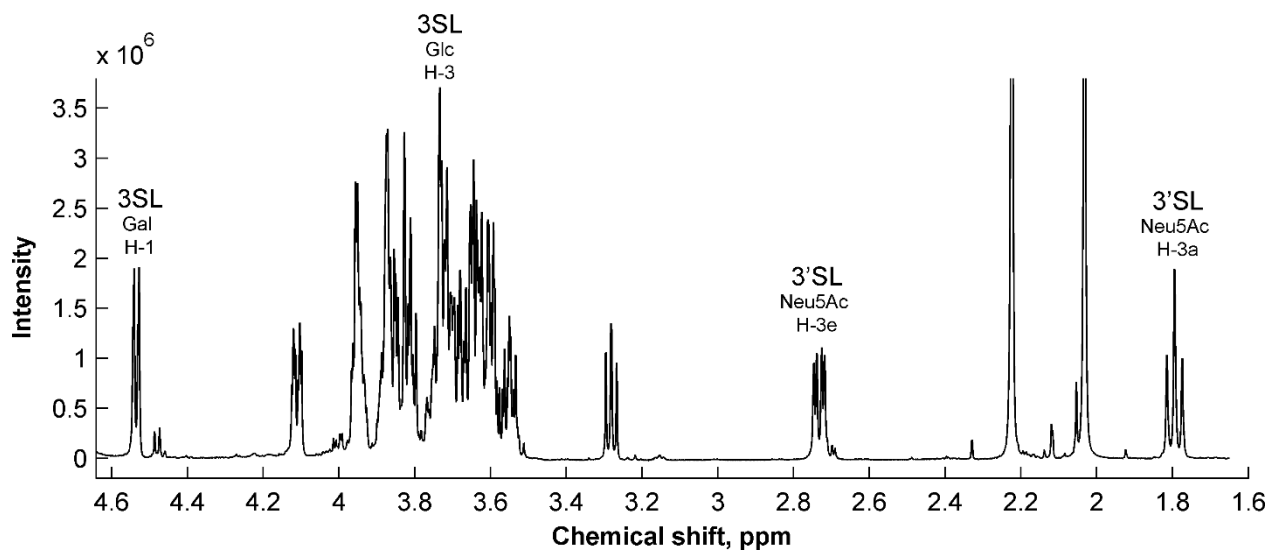

**S3 Fig. <sup>1</sup>H NMR spectrum (D<sub>2</sub>O, 600 MHz) of SialH trans-sialylation products.** To confirm the obtained reaction products, mixed samples were analysed by NMR. As expected, the <sup>1</sup>H NMR spectrum of the reaction products reveals the presence of 3'-sialyllactose (3'SL) and 6'-sialyllactose (6'SL). Of special interest was the signal at  $\delta$  4.537 (Gal H-1) ppm, rendered by the unknown reaction product. Additionally, a possible downfield shift of Glc H-3 ( $\delta$  3.56  $\rightarrow$   $\delta$  3.73 ppm) suggested sialylation at O-3 of the Glc residue. Since there are no extra Neu5Ac axial or equatorial H-3 signal in the <sup>1</sup>H NMR spectrum, the Neu5Ac signals at  $\delta$  1.795 (Neu5Ac H-3a) and  $\delta$  2.734 (Neu5Ac H-3e) ppm also suggest an ( $\alpha$ 2,3)-linked Neu5Ac residue. Thus, the unknown sialylation product was identified as 3-sialyllactose (3SL).
