# Supplementary material for: It All Starts with a Sandwich: Identification of Sialidases with Trans-Glycosylation Activity
Source: PubMed Central journal article supplement (PMC4930215; doi:10.1371/journal.pone.0158434), 2016-07-01
Supplement: pone.0158434.s004.pdf [file pone.0158434.s004.pdf]

**S1 Table. Sequence IDs of the sequences identified in the initial database screening.** 46 sequences were identified using the  $\Omega$ xRDR search motif. Of these, 30 were rejected before homology modeling due to redundancy or the fact that they were already known *Trypanosoma* trans-sialidases (TS), including TcTS. Redundancy indicates that there was more than one sequence from the same organism (sequence identities were  $\geq 77\%$  and is given in parentheses), and one from each was selected for homology modeling. The remaining 16 sequences were subjected to homology modeling (S2 Table).

| Sequence                                                                                                           | Reason for rejection |
|--------------------------------------------------------------------------------------------------------------------|----------------------|
| >gi 154508657 ref ZP_02044299.1  hypothetical protein ACTODO_01161 [Actinomyces odontolyticus ATCC 17982]          | Redundancy (93%)     |
| >gi 293191770 ref ZP_06609294.1  putative sialidase [Actinomyces odontolyticus F0309]                              |                      |
| >gi 325067903 ref ZP_08126576.1  BNR/Asp-box repeat protein [Actinomyces oris K20]                                 |                      |
| >gi 329944094 ref ZP_08292353.1  BNR/Asp-box repeat protein [Actinomyces sp. oral taxon 170 str. F0386]            | Redundancy (85%)     |
| >gi 329945272 ref ZP_08293083.1  hypothetical protein HMPREF9056_00968 [Actinomyces sp. oral taxon 170 str. F0386] |                      |
| >gi 320531595 ref ZP_08032538.1  BNR/Asp-box repeat protein [Actinomyces sp. oral taxon 171 str. F0337]            | Redundancy (84%)     |
| >gi 343521845 ref ZP_08758811.1  BNR/Asp-box repeat protein [Actinomyces sp. oral taxon 175 str. F0384]            | Redundancy (77%)     |
| >gi 365828654 ref ZP_09370449.1  hypothetical protein HMPREF0975_02232 [Actinomyces sp. oral taxon 849 str. F0330] |                      |
| >gi 326773842 ref ZP_08233124.1  sialidase (Neuraminidase) [Actinomyces viscosus C505]                             | Redundancy (97%)*    |
| >gi 256379736 ref YP_003103396.1  hypothetical protein Amir_5736 [Actinosynnema mirum DSM 43827]                   |                      |
| >gi 94501941 ref ZP_01308450.1  BNR/Asp-box repeat protein [Oceanobacter sp. RED65]                                |                      |
| >gi 88703428 ref ZP_01101144.1  sialidase family protein [Congregibacter litoralis KT71]                           |                      |
| >gi 88703428 ref ZP_01101144.1  sialidase family protein [Congregibacter litoralis KT71]                           | Redundancy (100%)    |
| >gi 88703428 ref ZP_01101144.1  sialidase family protein [Congregibacter litoralis KT71]                           | Redundancy (100%)    |
| >gi 88703428 ref ZP_01101144.1  sialidase family protein [Congregibacter litoralis KT71]                           | Redundancy (100%)    |
| >gi 88703428 ref ZP_01101144.1  sialidase family protein [Congregibacter litoralis KT71]                           | Redundancy (100%)    |
| >gi 225156471 ref ZP_03724806.1  hypothetical protein ObacDRAFT_8294 [Diplosphaera colitermitum TAV2]              |                      |
| >gi 390121970 ref ZP_10215489.1  hypothetical protein ObacTA_17328 [Opitutaceae bacterium TAV1]                    |                      |
| >gi 373852611 ref ZP_09595411.1  hypothetical protein Opit5DRAFT_3465 [Opitutaceae bacterium TAV5]                 |                      |
| >gi 378774370 ref YP_005176613.1  sialidase [Pasteurella multocida 36950]                                          | Redundancy (99%)     |
| >gi 386834192 ref YP_006239507.1  sialidase NanH [Pasteurella multocida subsp. multocida str. 3480]                |                      |
| >gi 283782130 ref YP_003372885.1  hypothetical protein Psta_4378 [Pirellula staleyi DSM 6068]                      |                      |
| >gi 330501037 ref YP_004377906.1  BNR/Asp-box repeat-containing protein [Pseudomonas mendocina NK-01]              |                      |
| >gi 319788706 ref YP_004090021.1  Dockerin type 1 [Ruminococcus albus 7]                                           |                      |
| >gi 302557686 ref ZP_07310028.1  conserved hypothetical protein [Streptomyces griseoflavus Tu4000]                 |                      |

|                                                                                                        |          |
|--------------------------------------------------------------------------------------------------------|----------|
| >gi 72388886 ref XP_844738.1  trans-sialidase [Trypanosoma brucei brucei strain 927/4 GUTat10.1]       | Known TS |
| >gi 72392022 ref XP_846305.1  trans-sialidase [Trypanosoma brucei brucei strain 927/4 GUTat10.1]       | Known TS |
| >gi 72393525 ref XP_847563.1  trans-sialidase [Trypanosoma brucei brucei strain 927/4 GUTat10.1]       | Known TS |
| >gi 72393527 ref XP_847564.1  trans-sialidase [Trypanosoma brucei brucei strain 927/4 GUTat10.1]       | Known TS |
| >gi 71403511 ref XP_804548.1  trans-sialidase [Trypanosoma cruzi strain CL Brener]                     | TcTS     |
| >gi 71407532 ref XP_806228.1  trans-sialidase [Trypanosoma cruzi strain CL Brener]                     | TcTS     |
| >gi 71408056 ref XP_806454.1  trans-sialidase [Trypanosoma cruzi strain CL Brener]                     | TcTS     |
| >gi 71409458 ref XP_807074.1  trans-sialidase [Trypanosoma cruzi strain CL Brener]                     | TcTS     |
| >gi 71409982 ref XP_807308.1  trans-sialidase [Trypanosoma cruzi strain CL Brener]                     | TcTS     |
| >gi 71410253 ref XP_807431.1  trans-sialidase [Trypanosoma cruzi strain CL Brener]                     | TcTS     |
| >gi 71410408 ref XP_807499.1  trans-sialidase [Trypanosoma cruzi strain CL Brener]                     | TcTS     |
| >gi 71410614 ref XP_807593.1  trans-sialidase [Trypanosoma cruzi strain CL Brener]                     | TcTS     |
| >gi 71412760 ref XP_808550.1  trans-sialidase [Trypanosoma cruzi strain CL Brener]                     | TcTS     |
| >gi 71422272 ref XP_812082.1  trans-sialidase [Trypanosoma cruzi strain CL Brener]                     | TcTS     |
| >gi 71423719 ref XP_812546.1  trans-sialidase [Trypanosoma cruzi strain CL Brener]                     | TcTS     |
| >gi 71649806 ref XP_813615.1  trans-sialidase [Trypanosoma cruzi strain CL Brener]                     | TcTS     |
| >gi 71649937 ref XP_813677.1  trans-sialidase [Trypanosoma cruzi strain CL Brener]                     | TcTS     |
| >gi 71653254 ref XP_815267.1  trans-sialidase [Trypanosoma cruzi strain CL Brener]                     | TcTS     |
| >gi 71655936 ref XP_816523.1  trans-sialidase [Trypanosoma cruzi strain CL Brener]                     | TcTS     |
| >gi 71660101 ref XP_821769.1  trans-sialidase [Trypanosoma cruzi strain CL Brener]                     | TcTS     |
| >gi 171913862 ref ZP_02929332.1  hypothetical protein VspiD_21825 [Verrucomicrobium spinosum DSM 4136] |          |

\*This sequence was 97% identical to the one from *Actinomyces oris*, which was finally selected for expression after fulfilling both criteria (SialA). The one from *A. oris* was selected because of its smaller size (the main difference between the two is the C-terminal of 226 amino acids found in the sialidase from *A. viscosus*).
