# Supplementary material for: It All Starts with a Sandwich: Identification of Sialidases with Trans-Glycosylation Activity
Source: PubMed Central journal article supplement (PMC4930215; doi:10.1371/journal.pone.0158434), 2016-07-01
Supplement: pone.0158434.s005.pdf [file pone.0158434.s005.pdf]

**S2 Table. Sequence IDs of the 3D alignments of the 15 sequences selected for homology modeling (HM).** Homology models were aligned to the TcTS crystal structure (PDB 1SOI) for evaluation against selection criteria 1 and 2 (Fig 2; S1 Fig). The reason for rejecting a sequence after homology modeling is indicated. Falling for criterion 1: Does not contain all nine conserved active site residues (S1 Fig). No template: No template available for homology modeling with HHPred. Candidate name in bold (SialA, SialP) indicates that these are sequences fulfilling the two selection criteria and selected for expression. Sequences of SialM and SialH were added after BLAST of sequences of SialA and SialP: of the two closest homologues for each, these two fulfilled both selection criteria.

| <b>Sequence</b>                                                                                                    | <b>Reason for rejection after HM</b> |
|--------------------------------------------------------------------------------------------------------------------|--------------------------------------|
| >gi 293191770 ref ZP_06609294.1  putative sialidase [Actinomyces odontolyticus F0309]                              | Criterion 1                          |
| >gi 325067903 ref ZP_08126576.1  BNR/Asp-box repeat protein [Actinomyces oris K20]                                 | <b>SialA</b>                         |
| >gi 365828654 ref ZP_09370449.1  hypothetical protein HMPREF0975_02232 [Actinomyces sp. oral taxon 849 str. F0330] | Criterion 1                          |
| >gi 329945272 ref ZP_08293083.1  hypothetical protein HMPREF9056_00968 [Actinomyces sp. oral taxon 170 str. F0386] | No template                          |
| >gi 256379736 ref YP_003103396.1  hypothetical protein Amir_5736 [Actinosynnema mirum DSM 43827]                   | No template                          |
| >gi 94501941 ref ZP_01308450.1  BNR/Asp-box repeat protein [Oceanobacter sp. RED65]                                | Criterion 1                          |
| >gi 88703428 ref ZP_01101144.1  sialidase family protein [Congregibacter litoralis KT71]                           | Criterion 1                          |
| >gi 225156471 ref ZP_03724806.1  hypothetical protein ObacDRAFT_8294 [Diplosphaera colitermitum TAV2]              | Criterion 1                          |
| >gi 390121970 ref ZP_10215489.1  hypothetical protein ObacTA_17328 [Opitutaceae bacterium TAV1]                    | Criterion 1                          |
| >gi 373852611 ref ZP_09595411.1  hypothetical protein Opit5DRAFT_3465 [Opitutaceae bacterium TAV5]                 | Criterion 1                          |
| >gi 386834192 ref YP_006239507.1  sialidase NanH [Pasteurella multocida subsp. multocida str. 3480]                | <b>SialP</b>                         |
| >gi 283782130 ref YP_003372885.1  hypothetical protein Psta_4378 [Pirellula staleyi DSM 6068]                      | Criterion 1                          |
| >gi 330501037 ref YP_004377906.1  BNR/Asp-box repeat-containing protein [Pseudomonas mendocina NK-01]              | Criterion 1                          |
| >gi 319788706 ref YP_004090021.1  Dockerin type 1 [Ruminococcus albus 7]                                           | Criterion 1                          |
| >gi 302557686 ref ZP_07310028.1  conserved hypothetical protein [Streptomyces griseoflavus Tu4000]                 | Criterion 1                          |
| >gi 171913862 ref ZP_02929332.1  hypothetical protein VspiD_21825 [Verrucomicrobium spinosum DSM 4136]             | Criterion 1                          |
| <b>Added after BLAST of SialA and SialP</b>                                                                        |                                      |
| gi 261493088 ref ZP_05989626.1  neuraminidase [Mannheimia haemolytica serotype A2 str. BOVINE]                     | <b>SialM</b>                         |
| gi 167854931 ref ZP_02477707.1  hypothetical protein HPS_05673 [Haemophilus parasuis 29755]                        | <b>SialH</b>                         |
